# Supplementary material for: An accessible and efficient mobile eye-tracking application for community-based cognitive impairment screening in China
Source: Research Square preprint supplement (doi:10.21203/rs.3.rs-7141899/v1), 2025-07-27
Supplement: Supplementary file 1 [file f9cc337ad2951a3db6627216.docx]

**Supplementary materials**

**Methods**

The Eye-tracking paradigm

Development and evaluation of logistic model

Image processing protocols

**List of Tables**

**Table S1**. Features of eye-tracking tasks

**Table S2a**. Characteristics of exploratory dataset

**Table S2b**. Characteristics of community cohorts

**Table S3a**. Differences of oculometric features between normal cognition and dementia groups in discovery dataset

**Table S3b**. Differences of oculometric features between normal cognition and cognitive impairment groups in external validation cohort

**Table S4**. Association between cognitive scores and m-ETA-derived features in discovery dataset

**Table S5a**. Association between cognitive scores and m-ETA-derived features in exploratory dataset

**Table S5b**. Association between cognitive scores and m-ETA-derived features in exploratory dataset

**Table S5c**. Association between brain atrophy scores and m-ETA-derived features in exploratory dataset

**Table S6**. Association between standardized uptake value ratio of tau deposition and m-ETA-derived features in exploratory dataset

**Table S7**. Differences between two probability groups in external validation cohort

**Table S8**. Differences between two probability groups in Chongming cohort

**Table S9**. Differences between two probability groups in Hongmei cohort

**List of Figures**

**Figure S1** Eye-tracking procedure

**Figure S2** Feature selection

**Figure S3** Area under the curve of different machine learning models

**Method**

**The Eye-tracking paradigm**

The anti-saccade task involved 12 trials requiring participants to inhibit reflexive eye movements by shifting gaze away from a red dot stimulus to the opposite screen location, with eight quantitative features recorded, such as Accuracy, Correct latency (mean), Correction latency (mean), Final ratio (mean), Initial amplitude (mean), Latency (mean), Peak velocity (mean), Velocity (mean). The VPC task comprised two phases: 1) Presentation: five-image pairs displayed for 5 seconds each for memorization, followed by a 3-minute anti-saccade task; 2) Recognition: ten novel-familiar image pairs displayed for 6 seconds each, requiring novel image viewing. Four features were recorded during the VPC task, including Central(mean), Central duration (mean), Fix duration valid (mean), Old duration (mean).

**Development and evaluation of logistic model**

To develop optimal screening tools with enhanced clinical utility, the analysis was conducted through the following steps: (1) Feature selection: Firstly, the spearman correlation coefficient was calculated to identify and remove the highly correlated variables (correlation coefficient>0.6). Forward stepwise regression was employed to retain the most informative features for model development. (2) Model selection: A ten-fold cross-validation approach was used to avoid overfitting and identify the model with the best performance. Model interpretability was visualized using Shapley Additive Explanations (SHAP) value analysis. (3) Model training and internal validation: The optimal model selected from model selection phase was conducted using a dataset split into training (75%) and test (25%) sets. To address potential dataset imbalances, sample weights were set to 'balanced', and the process was repeated 1,000 times to ensure robustness. (4) Multicenter external validation: The eye-tracking model subsequently external validated in another independent database, with additional assessments conducted to evaluate its real-world applicability in typical community settings.

**Image processing protocols**

PET image processing followed standardized protocols: raw images were spatially normalized to Montreal Neurological Institute (MNI) space using an 18F-florzolotau-specific template implemented in Statistical Parametric Mapping software (SPM12), followed by spatial smoothing with a 6 mm full-width at half-maximum (FWHM) Gaussian kernel. Based on the Anatomical Automatic Labeling (AAL) atlas, we defined five meta-regions of interest (meta-ROIs) encompassing frontal, parietal, temporal, occipital cortices, and hippocampus, with cerebellar gray matter serving as the reference region for standardized uptake value ratio (SUVR) calculations.

| **Table S1. Features of eye-tracking tasks** | |
| --- | --- |
| **Oculometric features** | **Definition** |
| **Anti-saccade task** | |
| Latency (mean, ms) | Mean time taken to make the first saccade in response to a target after the target appears. |
| Correct latency (mean, ms) | The latency of the first correct saccade when the direction of the first saccade is accurate. |
| Velocity (mean, pixel/ms) | Mean velocity of all the saccade |
| Peak velocity (mean, pixel/ms) | Mean peak velocity (in the horizontal direction) of the saccade. |
| Final ratio (mean, %) | The ratio of the actual saccade magnitude to the distance from the last fixation point prior to the target’s emergence to the target location. |
| Initial amplitude (mean, pixel) | The average change in horizontal distance for the initial saccade following the emergence of the target point. |
| Correction latency (mean, ms) | The mean latency for actively correcting an erroneous saccade: after the target appears, the direction of the first saccade is incorrect, but a subsequent saccade occurs in the correct direction. This latency is measured relative to the first saccade. |
| Accuracy (%) | Accuracy percentage of accurately shifting away from the stimuli in anti-saccade tests. |
| **VPC task** | |
| Central duration (mean, ms) | The mean duration of gaze fixation on the center point of the gaze tuple in the novel photo. |
| Old duration (mean, ms) | The mean duration of gaze fixation on the center point of the gaze tuple in the familiar photo. |
| Central (mean, %) | The ratio of dwell time on novel to familiar photographs |
| Fix duration valid (mean, ms) | The sum of the durations of all gaze fixations. |

| Table S2a. Characteristics of exploratory dataset | |
| --- | --- |
| Exploratory dataset | |
| N | 101 |
| Demographics |  |
| Age, years, mean (SD) | 62.2(9.3) |
| Sex, female, n (%) | 53(52.5) |
| Education, n (%) |  |
| illiteracy and primary | 19(18.8) |
| Junior | 25(24.8) |
| Senior and above | 57(56.4) |
| Neuropsychological Testing |  |
| MMSE, median (IQR) | 20.0(11) |
| MoCA, median (IQR) | 14.0(9) |
| Brain Imaging Score |  |
| MTA, median (IQR) | 2.0(1.3) |
| GCA, median (IQR) | 21.0(14.5) |
| SUVR |  |
| Frontal, mean (SD) | 1.65(0.45) |
| Parietal, mean (SD) | 1.66(0.47) |
| Temporal, mean (SD) | 1.89(0.41) |
| Occipital, mean (SD) | 1.90(0.54) |
| Hippocampus, mean (SD) | 1.60(0.42) |
| Abbreviations: GCA, Global Cortical Atrophy; IQR, interquartile range; MMSE, Mini Mental State Examination; MoCA, Montreal Cognitive Assessment; MTA, Medial Temporal lobe Atrophy; SD, standard deviation; SUVR, Standardized Uptake Value Ratio. | |

| Table S2b. Characteristics of community cohorts | | | |
| --- | --- | --- | --- |
|  | **External validation cohort** | **Hongmei cohort** | **Chongming cohort** |
| N | 433 | 660 | 2025 |
| Demographics |  |  |  |
| Age, years (mean, SD) | 68.1(3.5) | 69.5(8.0) | 69.5(7.7) |
| Sex, female, n (%) | 227(52.4) | 470(71.2) | 1319(65.1) |
| Education, n (%) |  |  |  |
| illiteracy and primary | 272(62.8) | 124(18.8) | 1399(69.1) |
| Junior | 113(26.1) | 265(40.2) | 477(23.6) |
| Senior and above | 48(11.1) | 271(41.1) | 149(7.4) |

| **Table S3a. Differences of oculometric features between normal cognition and dementia groups in discovery dataset** | | | |
| --- | --- | --- | --- |
|  | **NC** | **Dementia** | ***P*-value** |
|  | 106 | 98 |  |
| Anti-saccade task | | | |
| Latency(mean), ms | 276.55(179.16) | 241.26(142.09) | 0.088 |
| Correct latency(mean), ms | 287.44(197.76) | 284.99(218.70) | 0.435 |
| Correction latency(mean), ms | 241.23(162.96) | 337.07(167.61) | <0.001 |
| Velocity(mean), pixel/ms | 1.65(0.39) | 1.77(0.38) | 0.025 |
| Peak velocity (mean), pixel/ms | 4.47(1.75) | 4.77(1.58) | 0.137 |
| Final ratio(mean), % | 1.51(5.52) | 1.40(2.82) | <0.001 |
| Initial amplitude(mean), pixel | 10.01(16.44) | 0.23(29.18) | 0.001 |
| Accuracy, % | 0.53(0.21) | 0.38(0.23) | <0.001 |
| VPC task | | | |
| Central duration(mean), ms | 3432.76(1135.08) | 2670.65(764.91) | <0.001 |
| Old duration(mean), ms | 1084.82(475.39) | 2254.50(673.52) | <0.001 |
| Central(mean), % | 0.75(0.11) | 0.54(0.10) | <0.001 |
| Fix duration valid(mean), ms | 4517.58(1254.00) | 4925.16(963.63) | 0.017 |
| Abbreviations: NC, normal cognition. | | | |

| **Table S3b. Differences of oculometric features between normal cognition and cognitive impairment groups in external validation cohort** | | | |
| --- | --- | --- | --- |
|  | **NC** | **CI** | ***P*-value** |
|  | 315 | 118 |  |
| Anti-saccade task | | | |
| Latency(mean), ms | 233.52(129.93) | 252.58(133.03) | 0.180 |
| Correct latency(mean), ms | 274.98(176.18) | 311.39(193.53) | 0.075 |
| Correction latency(mean), ms | 307.66(116.50) | 400.87(143.37) | <0.001 |
| Velocity(mean), pixel/ms | 1.64(0.31) | 1.57(0.32) | 0.036 |
| Peak velocity (mean), pixel/ms | 4.28(1.46) | 3.90(1.31) | 0.013 |
| Final ratio(mean), % | 6.04(46.03) | 1.33(2.11) | <0.001 |
| Initial amplitude(mean), pixel | -0.16(26.73) | -2.33(26.53) | 0.951 |
| Accuracy, % | 0.53（0.21） | 0.39（0.22） | <0.001 |
| VPC task | | | |
| central duration(mean), ms | 3716.89(927.91) | 3089.09(874.75) | <0.001 |
| Old duration(mean), ms | 2032.27(743.78) | 2699.03(914.00) | <0.001 |
| Central(mean), % | 0.64(0.12) | 0.54(0.14) | <0.001 |
| Fix duration valid(mean), ms | 5749.16(746.10) | 5788.13(679.33) | 0.907 |
| Abbreviations: CI, cognitive impairment; NC, normal cognition. | | | |

| **Table S4. Association between cognitive scores and m-ETA-derived features in discovery dataset** | | | | | | | |
| --- | --- | --- | --- | --- | --- | --- | --- |
| **N=204** | **Correlation Pairs** | **Beta regression, betareg (formula= Neuropsychological scores ~ β*Oculomotor feature+ β1*Age + β2*Gender+β3*Edu** | | | | | |
| **Neuropsychological Assessments** | **Oculometric features** | **coefficient β** | ***P*-value** | | | **Fdr-*P*-value** | |
| MMSE | Accuracy | 1.415 | 0.000 | *** | 0.000 | | *** |
| MoCA | Accuracy | 1.575 | 0.000 | *** | 0.000 | | *** |
| Language | Accuracy | 1.096 | 0.000 | *** | 0.000 | | *** |
| Memory | Accuracy | 0.907 | 0.000 | *** | 0.000 | | *** |
| Attention and executive function | Accuracy | 1.798 | 0.000 | *** | 0.000 | | *** |
| MMSE | Central(mean) | 4.119 | 0.000 | *** | 0.000 | | *** |
| MoCA | Central (mean) | 3.964 | 0.000 | *** | 0.000 | | *** |
| Language | Central(mean) | 2.520 | 0.000 | *** | 0.000 | | *** |
| Memory | Central(mean) | 2.784 | 0.000 | *** | 0.000 | | *** |
| Attention and executive function | Central(mean) | 4.341 | 0.000 | *** | 0.000 | | *** |
| MMSE | Correction latency(mean) | (0.593) | 0.177 |  | 0.266 | |  |
| MoCA | Correction latency(mean) | (0.595) | 0.167 |  | 0.250 | |  |
| Language | Correction latency(mean) | (0.480) | 0.125 |  | 0.249 | |  |
| Memory | Correction latency(mean) | (0.291) | 0.316 |  | 0.474 | |  |
| Attention and executive function | Correction latency(mean) | (0.680) | 0.118 |  | 0.177 | |  |
| MMSE | Final ratio(mean) | 0.459 | 0.538 |  | 0.538 | |  |
| MoCA | Final ratio(mean) | 0.251 | 0.729 |  | 0.729 | |  |
| Language | Final ratio(mean) | 0.700 | 0.179 |  | 0.269 | |  |
| Memory | Final ratio(mean) | 0.314 | 0.500 |  | 0.600 | |  |
| Attention and executive function | Final ratio(mean) | 1.359 | 0.061 |  | 0.123 | |  |
| MMSE | Fix duration valid(mean) | 0.553 | 0.090 |  | 0.180 | |  |
| MoCA | Fix duration valid(mean) | 0.537 | 0.089 |  | 0.177 | |  |
| Language | Fix duration valid(mean) | 0.251 | 0.277 |  | 0.333 | |  |
| Memory | Fix duration valid(mean) | 0.231 | 0.270 |  | 0.474 | |  |
| Attention and executive function | Fix duration valid(mean) | 0.245 | 0.440 |  | 0.449 | |  |
| MMSE | Peak velocity(mean) | (0.304) | 0.461 |  | 0.538 | |  |
| MoCA | Peak velocity(mean) | (0.311) | 0.426 |  | 0.512 | |  |
| Language | Peak velocity(mean) | (0.078) | 0.782 |  | 0.782 | |  |
| Memory | Peak velocity(mean) | (0.013) | 0.960 |  | 0.960 | |  |
| Attention and executive function | Peak velocity(mean) | 0.292 | 0.449 |  | 0.449 | |  |
| Abbreviations: Fdr, False Discovery Rate; m-ETA, mobile eye-tracking application; MMSE, Mini Mental State Examination; MoCA, Montreal Cognitive Assessment.  Note: Coefficients highlighted with red color indicate negative correlation. Values highlighted with yellow color indicate statistical significance. * *P*<0.05, **P < 0.01, ***P < 0.001, ****P < 0.0001. | | | | | | | |

| **Table S5a. Association between cognitive scores and m-ETA-derived features in exploratory dataset** | | | | | | |
| --- | --- | --- | --- | --- | --- | --- |
| **N=101** | | **Correlation Pairs** | **Beta regression, betareg (formula= Neuropsychological scores ~ β*Oculomotor feature+ β1*Age + β2*Gender+β3*Edu** | | | |
| **Neuropsychological Assessments** | **Oculometric Features** | **coefficient β** | ***P* -value** | | **Fdr- *P* -value** | |
| MMSE | Accuracy | 1.252 | 0.007 | ** | 0.021 | * |
| MoCA | Accuracy | 1.346 | 0.002 | ** | 0.014 | * |
| CDR | Accuracy | (1.134) | 0.030 | * | 0.091 |  |
| FAQ | Accuracy | (0.487) | 0.284 |  | 0.426 |  |
| MMSE | Central (mean) | 2.049 | 0.006 | ** | 0.021 | * |
| MoCA | Central (mean) | 1.675 | 0.014 | * | 0.043 | * |
| CDR | Central (mean) | (0.573) | 0.455 |  | 0.546 |  |
| FAQ | Central (mean) | (1.029) | 0.159 |  | 0.426 |  |
| MMSE | Correction latency (mean) | (0.560) | 0.256 |  | 0.384 |  |
| MoCA | Correction latency (mean) | (0.534) | 0.216 |  | 0.325 |  |
| CDR | Correction latency (mean) | 1.106 | 0.018 | * | 0.091 |  |
| FAQ | Correction latency (mean) | 0.683 | 0.166 |  | 0.426 |  |
| MMSE | Final ratio (mean) | (0.322) | 0.696 |  | 0.696 |  |
| MoCA | Final ratio (mean) | (0.315) | 0.676 |  | 0.676 |  |
| CDR | Final ratio (mean) | (0.171) | 0.840 |  | 0.840 |  |
| FAQ | Final ratio (mean) | (0.024) | 0.975 |  | 0.975 |  |
| MMSE | Fix duration valid (mean) | (0.226) | 0.649 |  | 0.696 |  |
| MoCA | Fix duration valid (mean) | (0.449) | 0.300 |  | 0.360 |  |
| CDR | Fix duration valid (mean) | 0.511 | 0.302 |  | 0.453 |  |
| FAQ | Fix duration valid (mean) | 0.551 | 0.231 |  | 0.426 |  |
| MMSE | Peak velocity (mean) | 0.759 | 0.078 |  | 0.157 |  |
| MoCA | Peak velocity (mean) | 0.533 | 0.152 |  | 0.304 |  |
| CDR | Peak velocity (mean) | (0.651) | 0.135 |  | 0.271 |  |
| FAQ | Peak velocity (mean) | 0.215 | 0.590 |  | 0.708 |  |
| Abbreviations: Fdr, False Discovery Rate; m-ETA, mobile eye-tracking application; MMSE, Mini Mental State Examination; MoCA, Montreal Cognitive Assessment; FAQ, Functional Activites Questionnaire; CDR, Clinical Dementia Rating.  Coefficients highlighted with red color indicate negative correlation.  Note: Values highlighted with yellow color indicate statistical significance. * *P* <0.05, ** *P* < 0.01, *** *P* < 0.001, **** *P* < 0.0001 | | | | | | |

| **Table S5b. Association between cognitive scores and m-ETA-derived features in exploratory dataset** | | | | | | |
| --- | --- | --- | --- | --- | --- | --- |
| **N=76** | **Correlation Pairs** | **Beta regression, betareg (formula= Cognitive domain ~ β*Oculomotor feature+ β1*Age + β2*Gender+β3*Edu** | | | | |
| **Cognitive Domain** | **Oculometric features** | **coefficient β** | ***P*-value** | | **Fdr-*P*-value** | |
| Memory | Accuracy | 1.147 | 0.007 | ** | 0.041 | * |
| Visual Spatial Function | Accuracy | 0.799 | 0.148 |  | 0.304 |  |
| Language | Accuracy | 0.278 | 0.200 |  | 0.299 |  |
| Attention and executive function | Accuracy | 0.183 | 0.290 |  | 0.617 |  |
| Memory | Central (mean) | 1.800 | 0.014 | * | 0.041 | * |
| Visual Spatial Function | Central (mean) | 1.126 | 0.202 |  | 0.304 |  |
| Language | Central (mean) | 0.473 | 0.179 |  | 0.299 |  |
| Attention and Executive Function | Central (mean) | 0.557 | 0.058 |  | 0.348 |  |
| Memory | Correction latency (mean) | (0.665) | 0.187 |  | 0.280 |  |
| Visual Spatial Function | Correction latency (mean) | (0.956) | 0.120 |  | 0.304 |  |
| Language | Correction latency (mean) | (0.088) | 0.664 |  | 0.664 |  |
| Attention and Executive Function | Correction latency (mean) | 0.022 | 0.892 |  | 0.892 |  |
| Memory | Final ratio (mean) | (3.216) | 0.456 |  | 0.456 |  |
| Visual Spatial Function | Final ratio (mean) | (0.196) | 0.823 |  | 0.823 |  |
| Language | Final ratio (mean) | (0.372) | 0.301 |  | 0.362 |  |
| Attention and Executive Function | Final ratio (mean) | 0.137 | 0.569 |  | 0.683 |  |
| Memory | Fix duration valid (mean) | (0.461) | 0.261 |  | 0.313 |  |
| Visual Spatial Function | Fix duration valid (mean) | 0.645 | 0.198 |  | 0.304 |  |
| Language | Fix duration valid (mean) | (0.262) | 0.198 |  | 0.299 |  |
| Attention and Executive Function | Fix duration valid (mean) | (0.095) | 0.502 |  | 0.683 |  |
| Memory | Peak velocity (mean) | 0.839 | 0.021 | * | 0.041 | * |
| Visual Spatial Function | Peak velocity (mean) | (0.287) | 0.564 |  | 0.677 |  |
| Language | Peak velocity (mean) | 0.297 | 0.141 |  | 0.299 |  |
| Attention and Executive Function | Peak velocity (mean) | 0.147 | 0.309 |  | 0.617 |  |
| Abbreviations: Fdr, False Discovery Rate; m-ETA, mobile eye-tracking application.  Note: 76 AD patients were able to finish the assessments of subcognitive domains. Coefficients highlighted with red color indicate negative correlation. Values highlighted with yellow color indicate statistical significance. **P* <0.05, ***P* < 0.01, *** *P* < 0.001, *****P* < 0.0001 | | | | | | |

| **Table S5c. Association between brain atrophy scores and m-ETA-derived features in exploratory dataset** | | | | | | |
| --- | --- | --- | --- | --- | --- | --- |
| **N=101** | **Correlation Pairs** | **Beta regression, betareg (formula= Brain atrophy score ~ β*Oculomotor feature+ β1*Age + β2*Gender+β3*Edu** | | | | |
| **Brain Atrophy Score** | **Oculometric features** | **coefficient β** | ***P*-value** | | **Fdr-*P*-value** | |
| MTA | Accuracy | (0.127) | 0.013 | * | 0.080 |  |
| GCA | Accuracy | (1.662) | 0.001 | ** | 0.007 | ** |
| Frontal | Accuracy | (0.875) | 0.008 | ** | 0.050 | * |
| Parieto-occipital | Accuracy | (0.752) | 0.030 | * | 0.178 |  |
| Temporal | Accuracy | (0.226) | 0.056 |  | 0.168 |  |
| Ventricle | Accuracy | (1.213) | 0.006 | ** | 0.035 | * |
| MTA | Central(mean) | (0.143) | 0.048 | * | 0.144 |  |
| GCA | Central(mean) | (2.021) | 0.020 | * | 0.059 |  |
| Frontal | Central(mean) | (0.842) | 0.099 |  | 0.298 |  |
| Parieto-occipital | Central(mean) | (0.869) | 0.146 |  | 0.437 |  |
| Temporal | Central(mean) | (0.371) | 0.041 | * | 0.168 |  |
| Ventricle | Central(mean) | (1.207) | 0.085 |  | 0.255 |  |
| MTA | Correction latency(mean) | 0.042 | 0.278 |  | 0.555 |  |
| GCA | Correction latency(mean) | 0.256 | 0.629 |  | 0.755 |  |
| Frontal | Correction latency(mean) | 0.006 | 0.985 |  | 0.985 |  |
| Parieto-occipital | Correction latency(mean) | 0.264 | 0.428 |  | 0.513 |  |
| Temporal | Correction latency(mean) | 0.128 | 0.254 |  | 0.509 |  |
| Ventricle | Correction latency(mean) | 0.321 | 0.428 |  | 0.643 |  |
| MTA | Final ratio(mean) | 0.006 | 0.962 |  | 0.962 |  |
| GCA | Final ratio(mean) | (0.823) | 0.389 |  | 0.755 |  |
| Frontal | Final ratio(mean) | (3.177) | 0.475 |  | 0.712 |  |
| Parieto-occipital | Final ratio(mean) | (0.473) | 0.405 |  | 0.513 |  |
| Temporal | Final ratio(mean) | (0.016) | 0.872 |  | 0.872 |  |
| Ventricle | Final ratio(mean) | (0.870) | 0.275 |  | 0.550 |  |
| MTA | Fix duration valid(mean) | (0.027) | 0.559 |  | 0.771 |  |
| GCA | Fix duration valid(mean) | (0.288) | 0.579 |  | 0.755 |  |
| Frontal | Fix duration valid(mean) | (0.285) | 0.346 |  | 0.692 |  |
| Parieto-occipital | Fix duration valid(mean) | (0.080) | 0.809 |  | 0.809 |  |
| **N=101** | **Correlation Pairs** | **Beta regression, betareg (formula= Brain atrophy score ~ β*Oculomotor feature+ β1*Age + β2*Gender+β3*Edu** | | | | |
| **Brain Atrophy Score** | **Oculometric features** | **coefficient β** | ***P*-value** | | **Fdr-*P*-value** | |
| Temporal | Fix duration valid(mean) | (0.011) | 0.855 |  | 0.872 |  |
| Ventricle | Fix duration valid(mean) | (0.110) | 0.787 |  | 0.787 |  |
| MTA | Peak velocity(mean) | (0.016) | 0.643 |  | 0.771 |  |
| GCA | Peak velocity(mean) | (0.068) | 0.882 |  | 0.882 |  |
| Frontal | Peak velocity(mean) | 0.100 | 0.702 |  | 0.842 |  |
| Parieto-occipital | Peak velocity(mean) | 0.338 | 0.296 |  | 0.513 |  |
| Temporal | Peak velocity(mean) | (0.024) | 0.705 |  | 0.872 |  |
| Ventricle | Peak velocity(mean) | (0.203) | 0.568 |  | 0.682 |  |
| Abbreviations: Fdr, False Discovery Rate; m-ETA, mobile eye-tracking application; MTA, Medial Temporal lobe Atrophy; GCA, Global Cortical Atrophy; Frontal, Parieto-occipital, Temporal, Ventricle were originally outlined in the GCA scale;  Note: Coefficients highlighted with red color indicate negative correlation. Two independent raters performed standardized visual assessments, demonstrating excellent inter-rater reliability (weighted κ: MTA=0.80, GCA=0.62; regional atrophy outlined in the GCA scale κ=0.77-0.88). Values highlighted with yellow color indicate statistical significance. * *P* <0.05, ** *P* < 0.01, *** *P* < 0.001, **** *P* < 0.0001. | | | | | | |

| **Table S6. Association between standardized uptake value ratio of tau deposition and m-ETA-derived features in exploratory dataset** | | | | | | |
| --- | --- | --- | --- | --- | --- | --- |
| **N=82** | **Correlation Pairs** | **Linear regression, lm (formula = Eye Para. ~ β*Brain Area +β1 *Age +β2*Gender+β3*Edu** | | | | |
| **Brain Area** | **Oculometric features** | **coefficientβ** | ***P*-value** | | **Fdr-*P*-value** | |
| Frontal | Accuracy | (0.196) | 0.422 |  | 0.703 |  |
| Parietal | Accuracy | 0.048 | 0.848 |  | 0.848 |  |
| Temporal | Accuracy | 0.060 | 0.792 |  | 0.848 |  |
| Occipital | Accuracy | 0.298 | 0.308 |  | 0.703 |  |
| Hippocampus | Accuracy | 0.415 | 0.068 |  | 0.339 |  |
| Frontal | Central(mean) | (0.812) | 0.053 |  | 0.067 |  |
| Parietal | Central(mean) | (0.907) | 0.036 | * | 0.060 |  |
| Temporal | Central(mean) | (1.004) | 0.010 | ** | 0.050 | * |
| Occipital | Central(mean) | (1.093) | 0.030 | * | 0.060 |  |
| Hippocampus | Central(mean) | (0.108) | 0.788 |  | 0.788 |  |
| Frontal | Correction latency(mean) | 0.000 | 0.290 |  | 0.770 |  |
| Parietal | Correction latency(mean) | 0.000 | 0.354 |  | 0.770 |  |
| Temporal | Correction latency(mean) | (0.000) | 0.896 |  | 0.896 |  |
| Occipital | Correction latency(mean) | 0.000 | 0.575 |  | 0.770 |  |
| Hippocampus | Correction latency(mean) | (0.000) | 0.616 |  | 0.770 |  |
| Frontal | Final ratio(mean) | (0.001) | 0.419 |  | 0.970 |  |
| Parietal | Final ratio(mean) | (0.000) | 0.926 |  | 0.970 |  |
| Temporal | Final ratio(mean) | (0.000) | 0.719 |  | 0.970 |  |
| Occipital | Final ratio(mean) | 0.000 | 0.875 |  | 0.970 |  |
| Hippocampus | Final ratio(mean) | 0.000 | 0.970 |  | 0.970 |  |
| Frontal | Fix duration valid(mean) | (0.000) | 0.386 |  | 0.644 |  |
| Parietal | Fix duration valid(mean) | (0.000) | 0.624 |  | 0.755 |  |
| Temporal | Fix duration valid(mean) | (0.000) | 0.173 |  | 0.525 |  |
| Occipital | Fix duration valid(mean) | (0.000) | 0.755 |  | 0.755 |  |
| Hippocampus | Fix duration valid(mean) | (0.000) | 0.210 |  | 0.525 |  |
| Frontal | Peak velocity(mean) | (0.046) | 0.220 |  | 0.551 |  |
| Parietal | Peak velocity(mean) | (0.035) | 0.374 |  | 0.623 |  |
| Temporal | Peak velocity(mean) | 0.001 | 0.979 |  | 0.979 |  |
| **N=82** | **Correlation Pairs** | **Linear regression, lm (formula = Eye Para. ~ β*Brain Area +β1 *Age +β2*Gender+β3*Edu** | | | | |
| **Brain Area** | **Oculometric features** | **coefficientβ** | ***P*-value** | | **Fdr-*P*-value** | |
| Occipital | Peak velocity(mean) | (0.014) | 0.756 |  | 0.946 |  |
| Hippocampus | Peak velocity(mean) | 0.093 | 0.008 | ** | 0.040 | * |
| Abbreviations: Fdr, False Discovery Rate; m-ETA, mobile eye-tracking application.  Note: Coefficients highlighted with red color indicate negative correlation. Values highlighted with yellow color indicate statistical significance. * *P*<0.05, ** *P* < 0.01, *** *P* < 0.001, **** *P* < 0.0001 | | | | | | |

| Table S7. Differences between two probability groups in external validation cohort | | | |
| --- | --- | --- | --- |
|  | **Low Prob** | **High Prob** | ***P*-value** |
| N | 265 | 168 |  |
| Demographics |  |  |  |
| Age, years, mean (SD) | 67.9(3.2) | 68.3(4.0) | 0.052 |
| Sex, female, n (%) | 133(50.2) | 94(56.0) | 0.242 |
| Education, n (%) |  |  | <0.001 |
| illiteracy and primary | 147(55.5) | 125(74.4) |  |
| Junior | 79(29.8) | 34(20.2) |  |
| Senior and above | 39(14.7) | 9(5.4) |  |
| Neuropsychological Testing |  |  |  |
| MMSE, median (IQR) | 24.0(6) | 21.0(10.0) | <0.001 |
| MoCA, median (IQR) | 17.0(7.0) | 13.0(8.0) | <0.001 |
| z-score |  |  |  |
| Memory, mean (SD) |  |  |  |
| Edu<6 years | 0.40(1.0) | 0.18(1.0) | 0.032 |
| Edu≥ 6 years | -0.45(0.7) | -0.66(0.7) | 0.101 |
| Attention and executive function, mean (SD) | 0.12(0.7) | -0.19(1.0) | <0.001 |
| Language, mean (SD) | 0.18(1.0) | -0.28(1.0) | <0.001 |
| Visual-Spatial, mean (SD) | 0.12(1.0) | -0.19(1.0) | <0.001 |
| APOE N | 239 | 156 |  |
| APOE-ε4allele+ | 44(18.4) | 27(17.3) | 0.780 |
| Abbreviations: MMSE, Mini Mental State Examination; MoCA, Montreal Cognitive Assessment;  Note: Low Prob: Participants with a predicted probability below the cutoff score in the eye-tracking model; High Prob: Participants with a predicted probability above the cutoff score in the eye-tracking model. | | | |

| Table S8. Differences between two probability groups in Chongming cohort | | | |
| --- | --- | --- | --- |
| Chongming | **Low Prob** | **High Prob** | ***P*-value** |
| N | 1010 | 1015 |  |
| Demographics |  |  |  |
| Age, years, mean (SD) | 68.5(7.7) | 70.6(7.6) | <0.001 |
| Gender, female, n (%) | 665(65.8) | 654(64.4) | <0.001 |
| Education, n (%) |  |  | <0.001 |
| illiteracy and primary | 634(62.8) | 765(75.4)) |  |
| Junior | 277(27.4) | 200(19.7) |  |
| Senior and above | 99(9.8) | 50(4.9) |  |
| Neuropsychological Testing |  |  |  |
| AD8, median (IQR) | 0.0(1.0) | 0.0(3.0) | <0.001 |
| Abbreviations: AD8, Alzheimer’s Disease 8; Prob, probability; IQR, interquartile range; SD, standard deviation. | | | |

| Table S9. Differences between two probability groups in Hongmei cohort | | | |
| --- | --- | --- | --- |
| Hongmei | **Low Prob** | **High Prob** | ***P*-value** |
| N | 368 | 292 |  |
| Demographics |  |  |  |
| Age, years mean (SD) | 68.4(6.6) | 70.8(9.2) | <0.001 |
| Gender, female, n (%) | 269(73.1) | 201 (68.8) | 0.230 |
| Education, n (%) |  |  | <0.001 |
| illiteracy and primary | 47(12.8) | 77(26.4) |  |
| Junior | 155(42.1) | 110(37.7) |  |
| Senior and above | 166(45.1) | 105(36.0) |  |
| Neuropsychological Testing |  |  |  |
| AD8, median (IQR) | 2.0(8) | 4.0(7) | 0.002 |
| Abbreviations: AD8, Alzheimer disease 8; IQR, interquartile range; SD, standard deviation. | | | |

**Figure S1 Eye-tracking procedure**

**
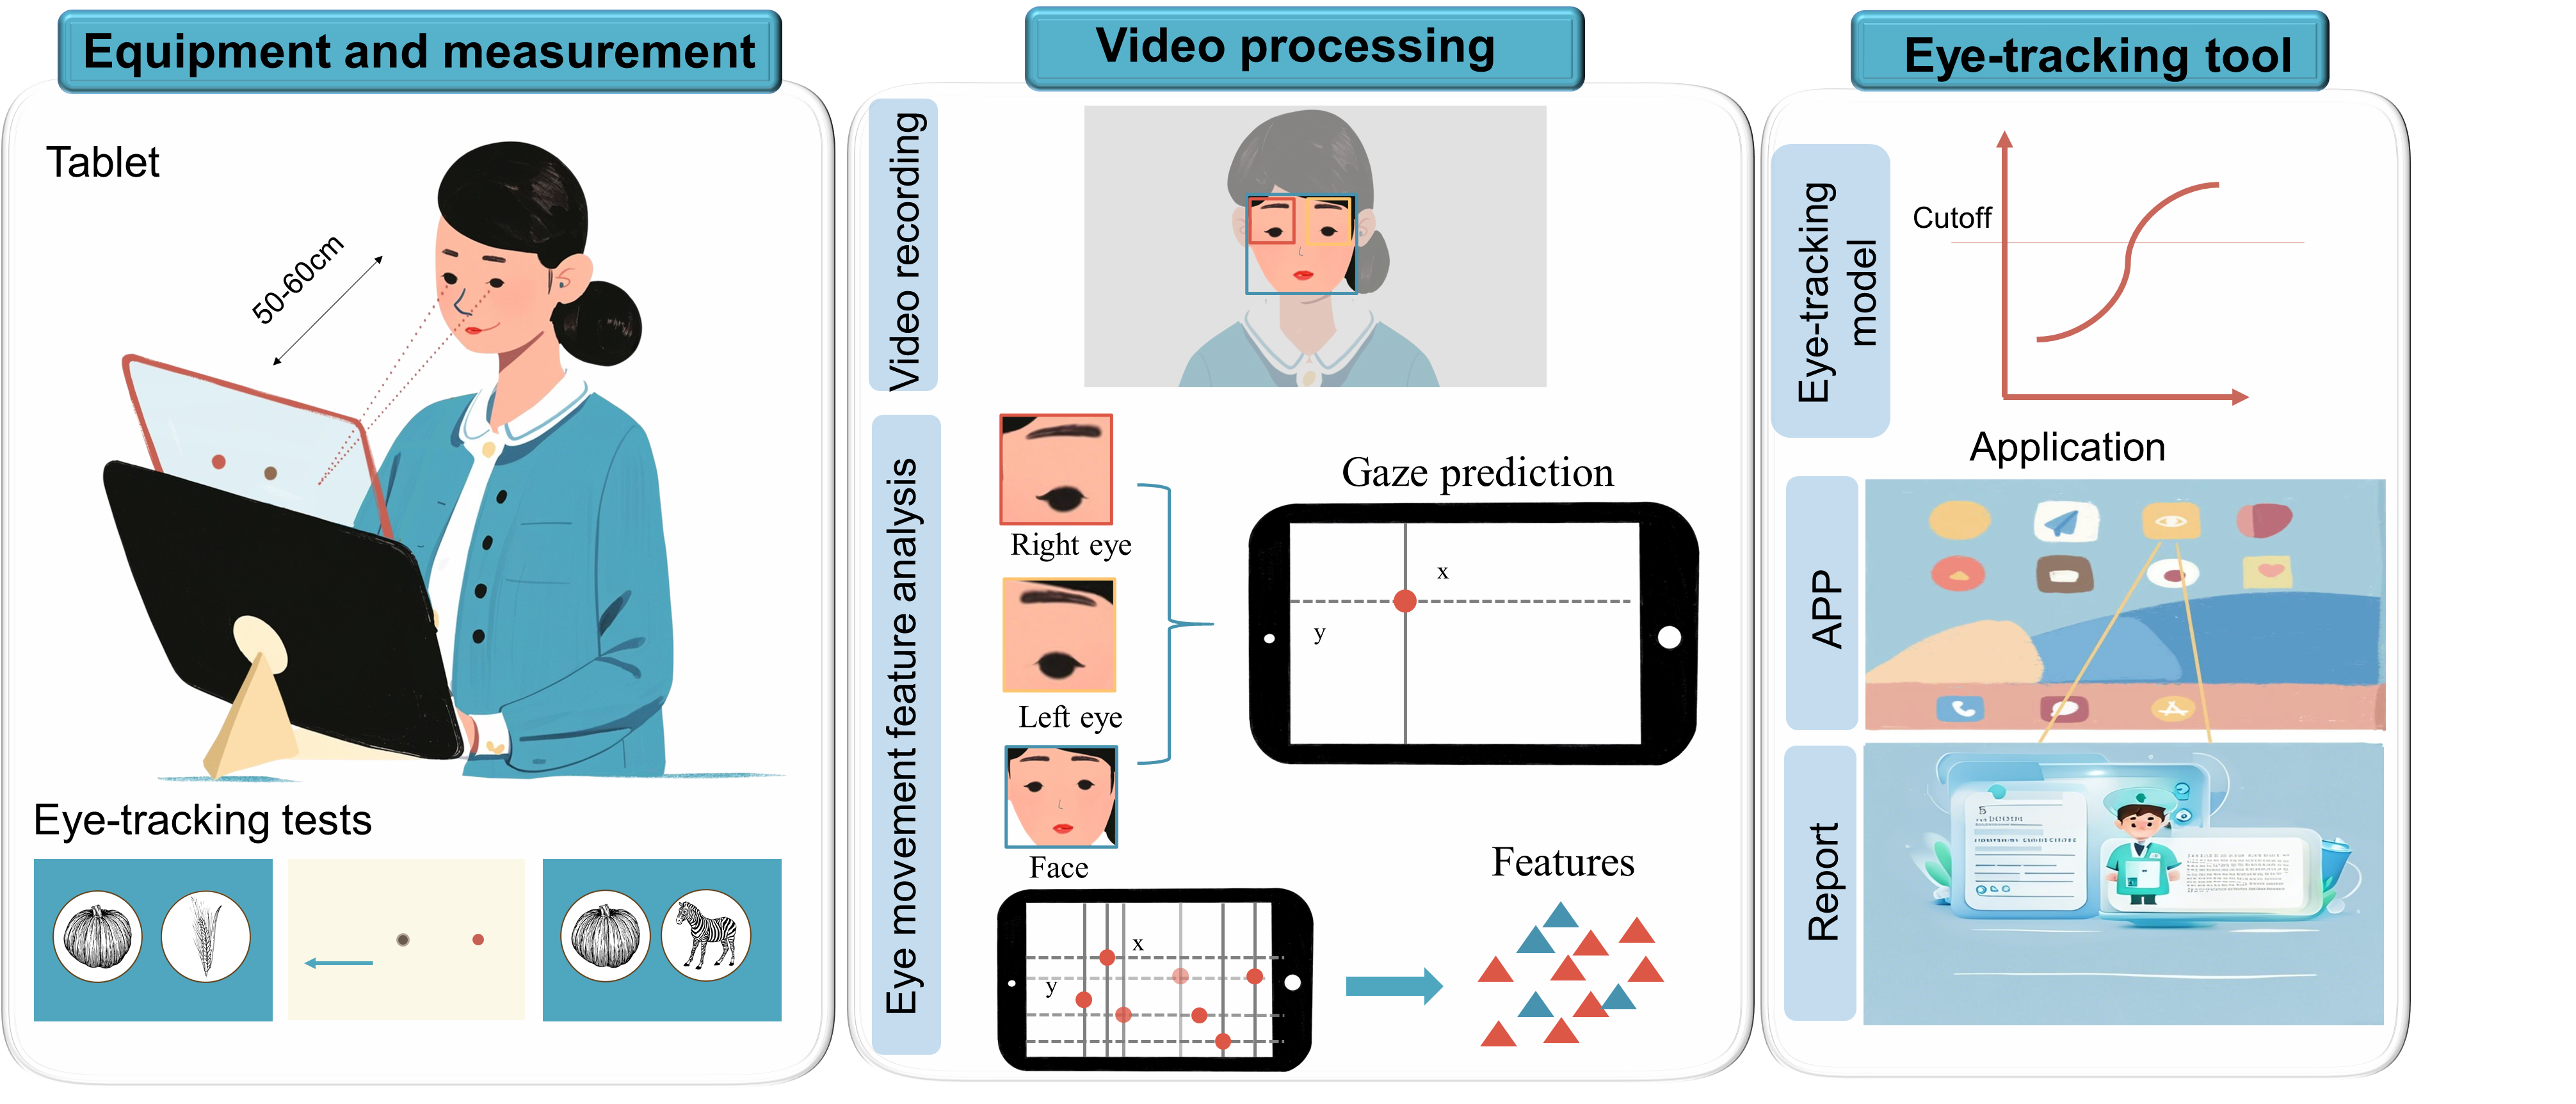
**

Note: The Artificial Intelligence-based Mobile Eye-tracking Application(m-ETA) comprised an Android-based application deployed on a tablet for video acquisition. After subjects finished the eye-tracking tests, m-ETA utilized a deep learning architecture to estimate gaze direction for oculometric feature analysis. Then, the results of risk probabilities are presented as a diagnostic report and returned to the app

**
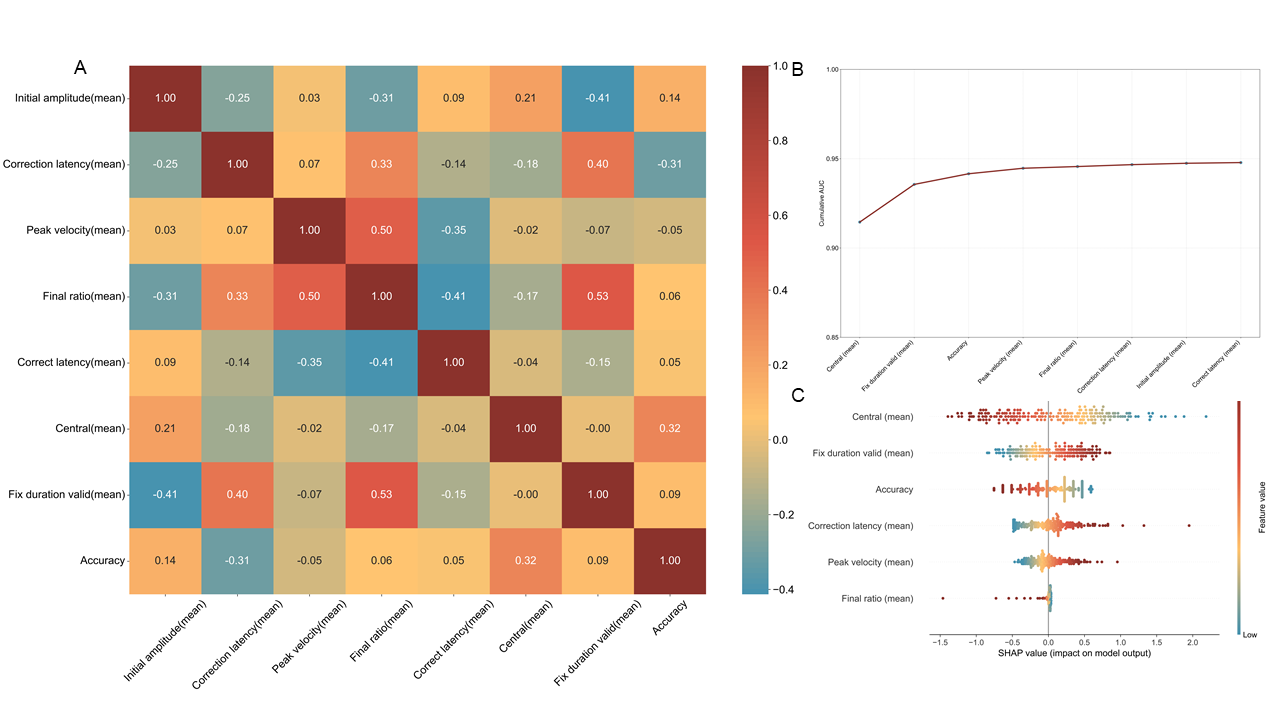
Figure S2 Feature selection**

Note: Heatmap analysis of oculometric feature (A), Stepwise regression of the eye-tracking model(B), SHAP summary plots of eye-tracking model(C). Individual shap values of the oculometric features are ranked according to their contributions in plot C. SHAP analysis revealed Central(mean) as the feature with the broadest value distribution in the VPC task, while Accuracy dominated as the strongest predictor in antisaccade task.

**Figure S3 Area under the curve of different machine learning models**

**

**

Note: AUC of algorithms are as follows:Logistic Regression,0.92±0.07; Linear Discriminant Analysis,0.92±0.06; Support Vector Machine,0.90±0.08; Gradient Boosting,0.90±0.08; Extra Trees,0.90±0.10; Multi-Layer Perceptron,0.89±0.08; Random Forest,0.89±0.09; K Nearest Neighbors,0.89±0.09; Gaussian Naïve Bayes,0.88±0.12; AdaBoost,0.70±0.08; Decision Tree,0.69±0.11. Comparative analysis of machine learning algorithms revealed that logistic regression (LR) achieved optimal performance (AUC: 0.92 ± 0.07)
